# Supplementary material
Source: PubMed Central journal article supplement (PMC4297645)

**Supplementary Figure 1: Post-natal clonal expansions are restricted to bone and cartilage.**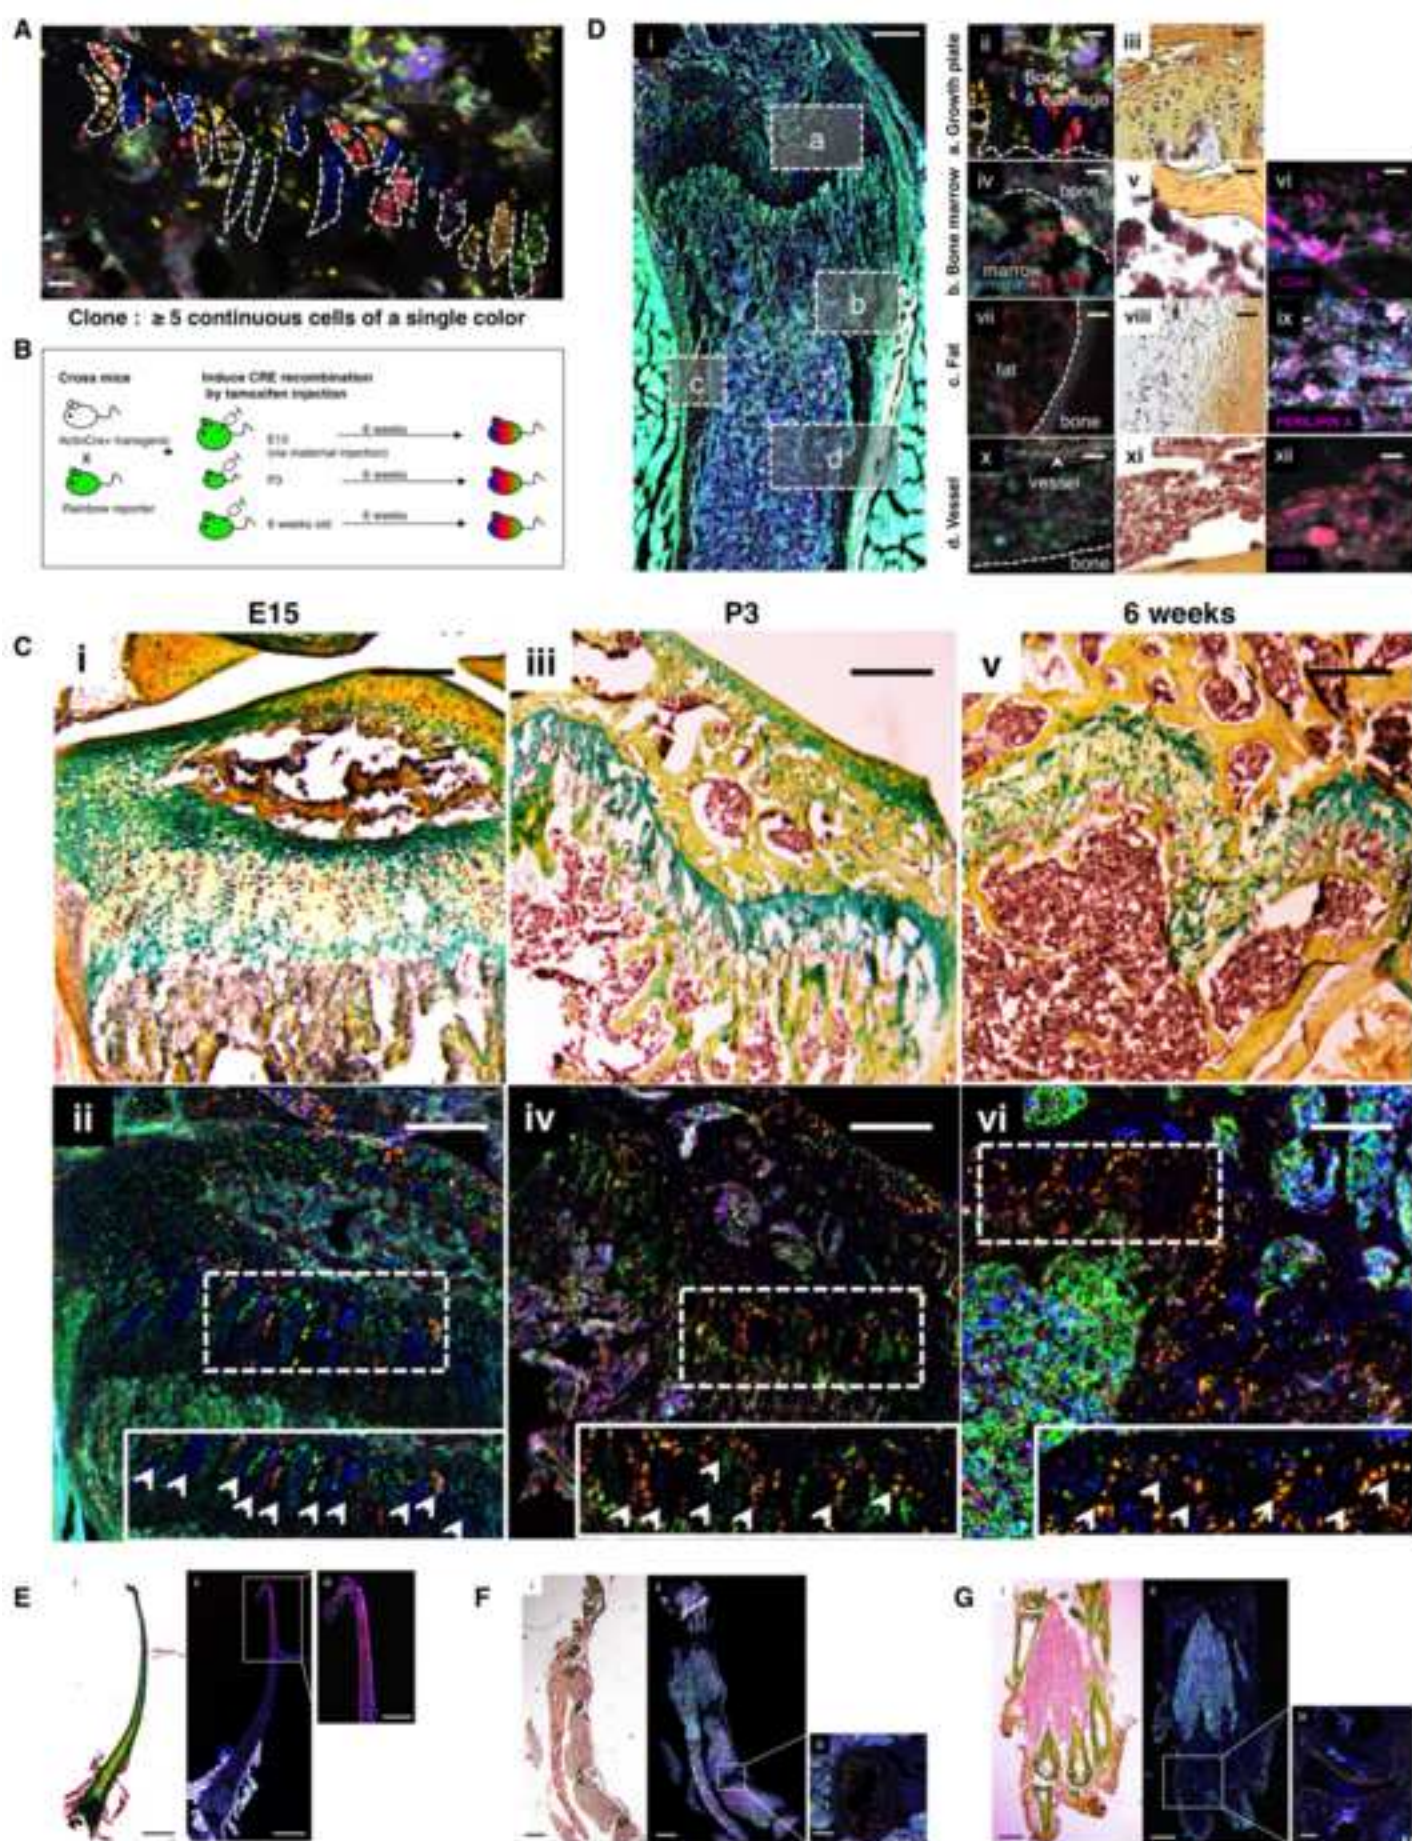

## Supplementary figure 2: Cognate ligand / receptor expression in bone marrow subsets.

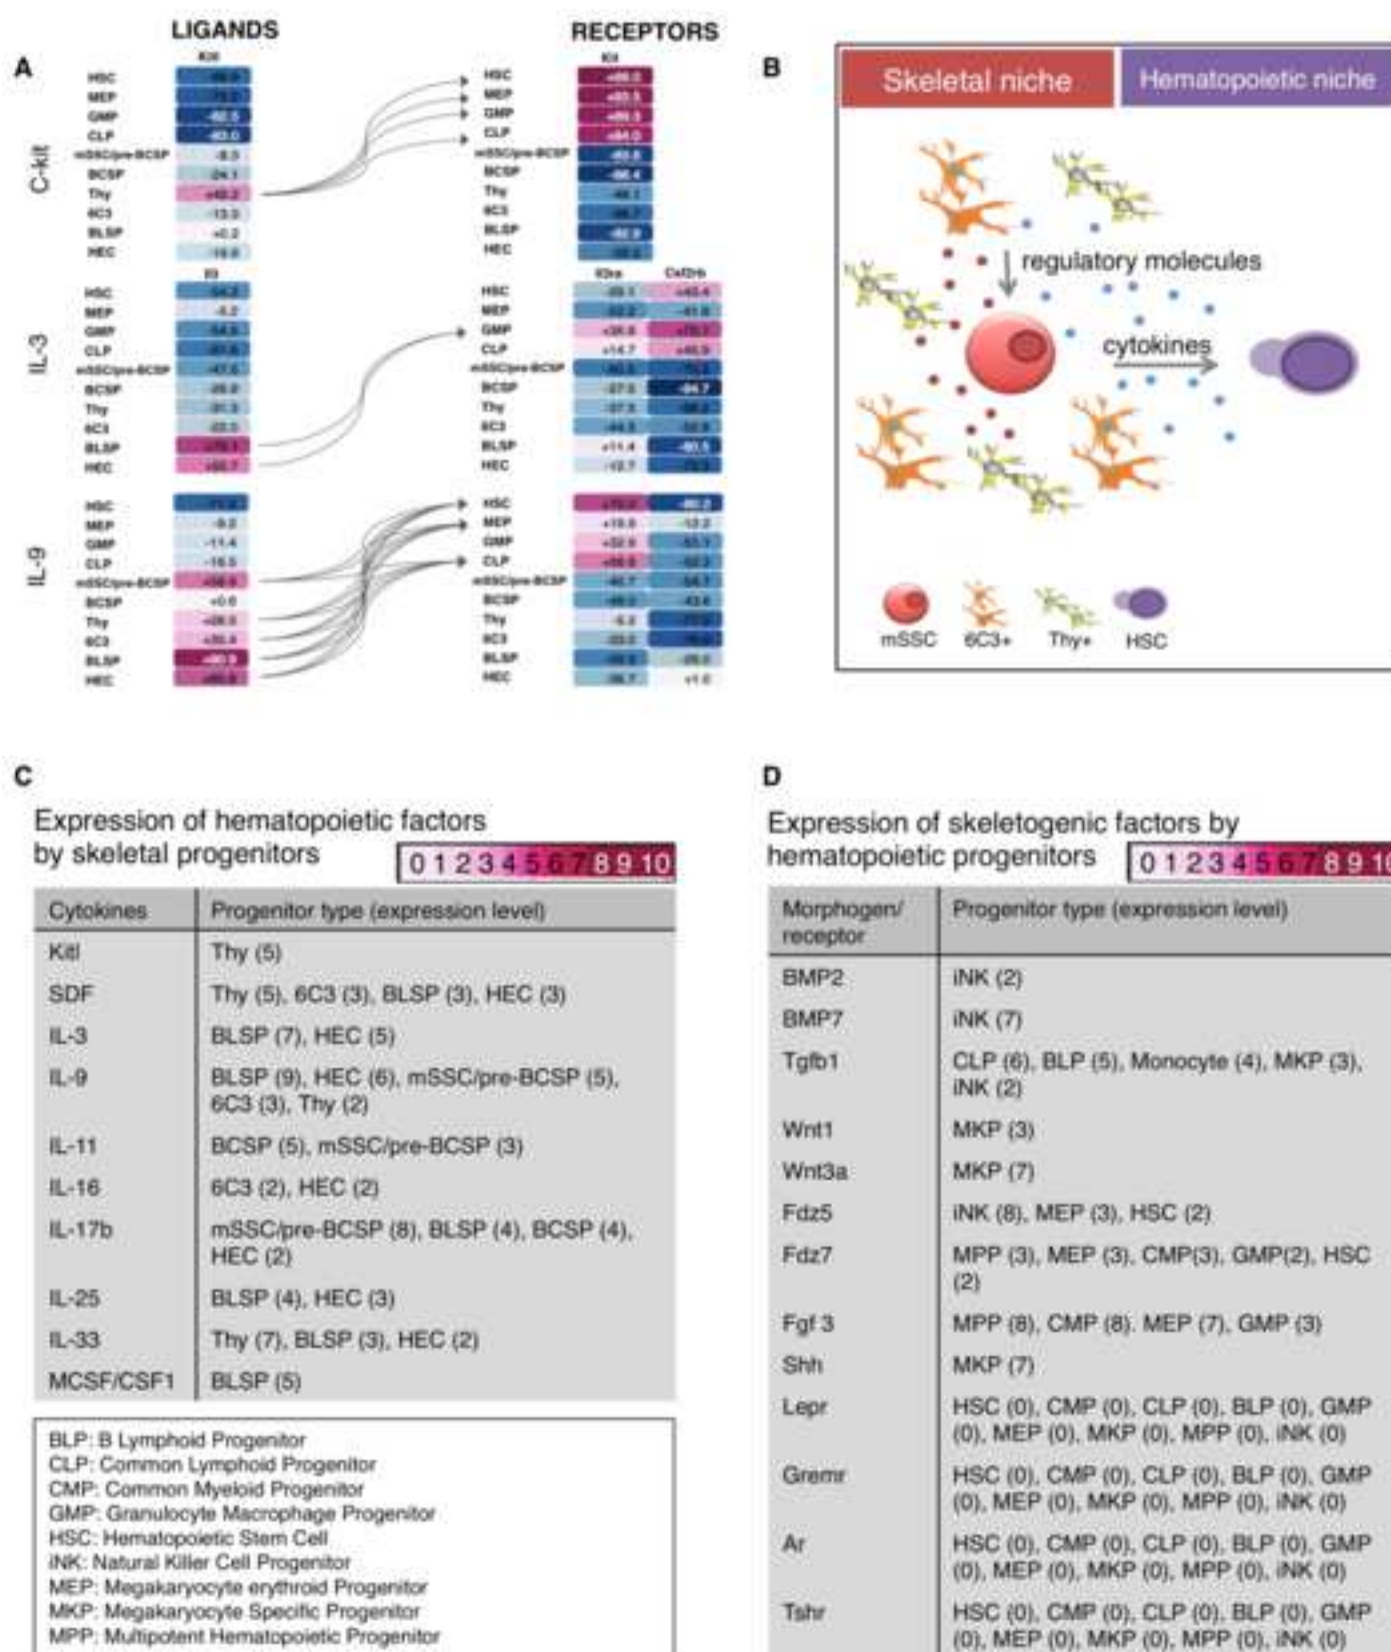

### Supplementary Figure 3: MX1-Cre labeled cells encompass the mSSC population.

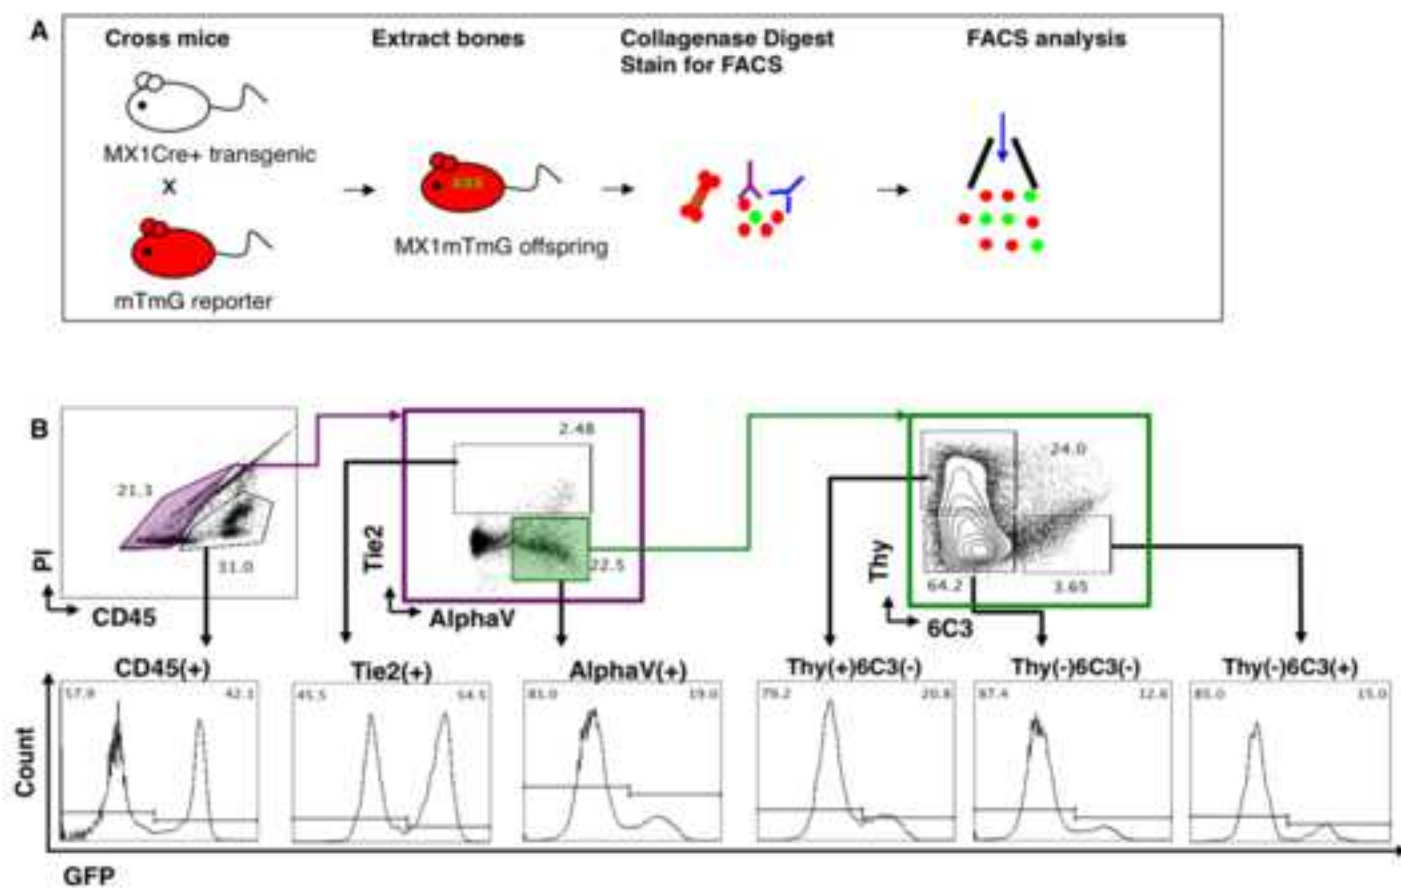

**Supplementary figure 4: Skeletogenic population is specific to the [AlphaV+] subset.**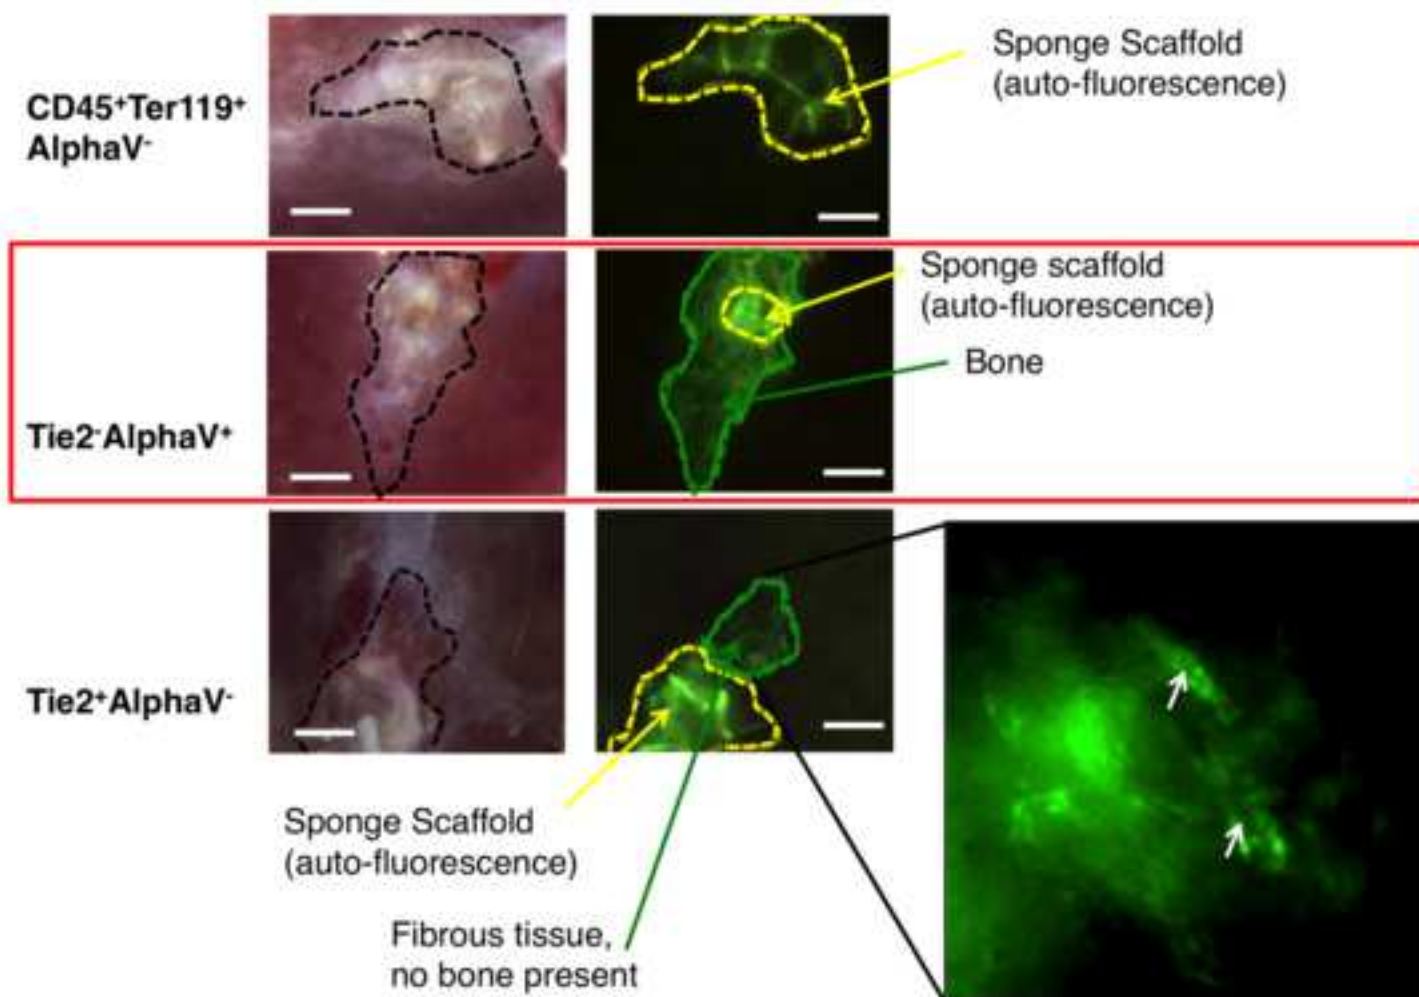

### Supplementary figure 5: Single cell RNA sequencing reveals co-expression of BMP2 and its receptor in mSSCs.

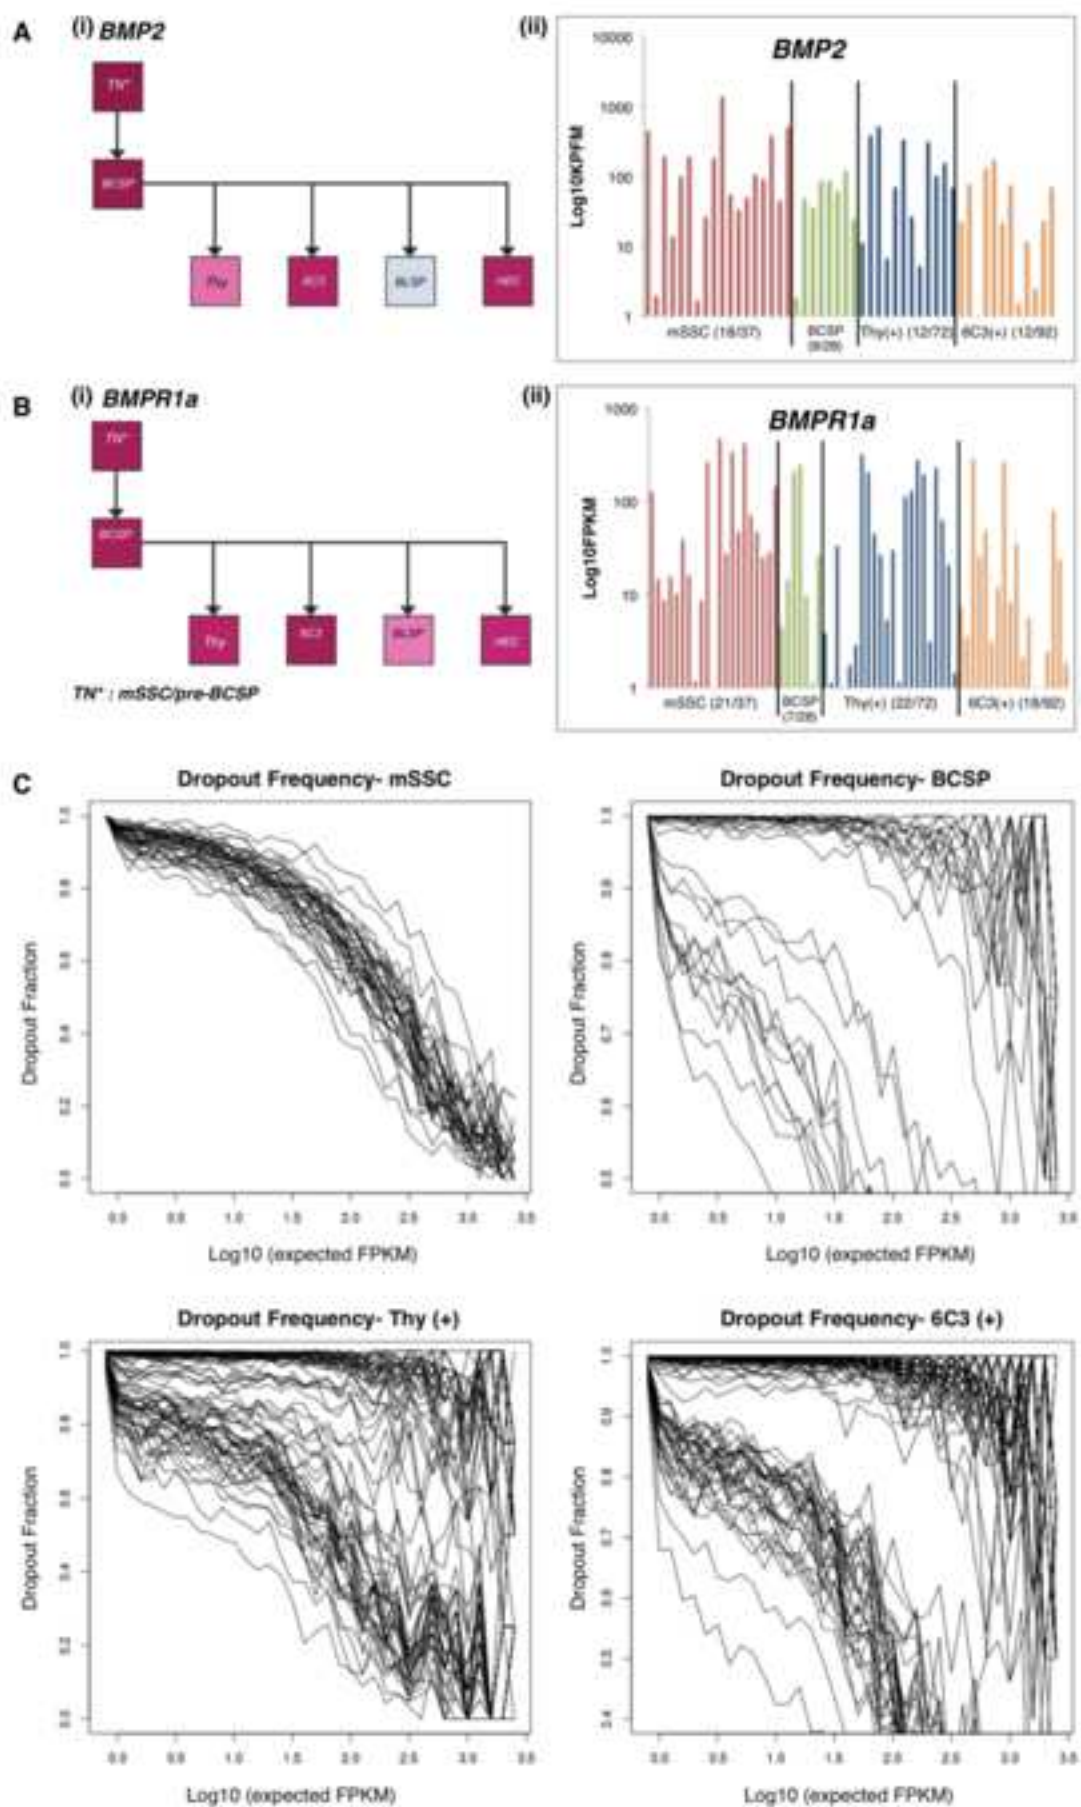

## Supplementary figure 6: Injury induces local mSSC expansion.

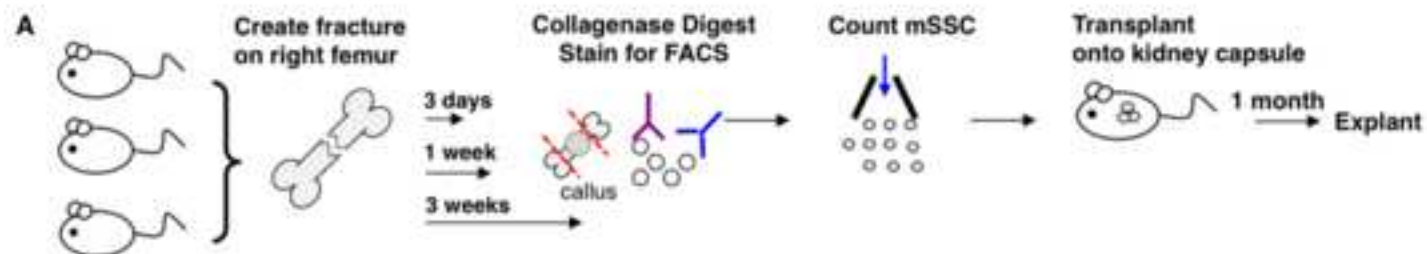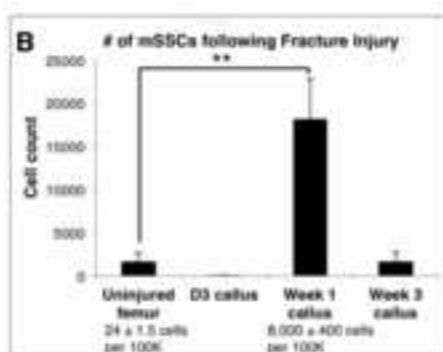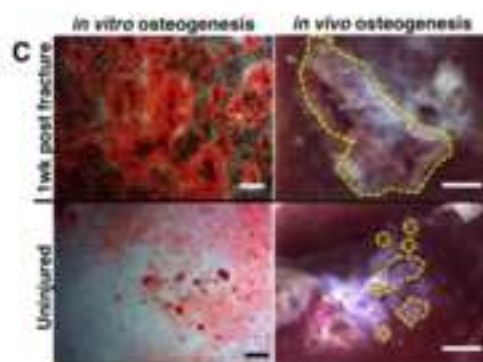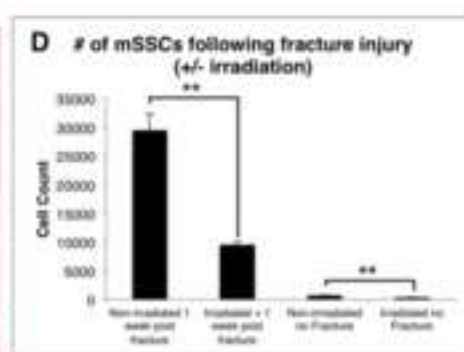

Supplement: NIHMS652826-supplement-02.pdf [file NIHMS652826-supplement-02.pdf]
